# Supplementary material
Source: HighWire-hosted journal article supplement (https://bmjopen.bmj.com/content/12/4/e060012)
Supplement: inline-supplementary-material-1 [file inline-supplementary-material-1.pdf]

## Appendix 1: interview schedule

### 1. Demographic information

Age

Gender

Education

Specialisation

Years of practice

2. Could you tell me about becoming a physiotherapist?

3. What do you like most about being a physiotherapist?

4. Could you tell me what led to you becoming involved in caring for patients with COVID-19?

5. Could you tell me about the activities you undertake in working with patients with COVID-19?

Probe for knowledge; skills; social/professional role and identity; beliefs about capabilities; beliefs about consequences; environmental factors.

6. What do you think about the way COVID-19 is being managed in your health facility?

Prompts: What are the expectations on you managing COVID-19? What are the facilitators or barriers to your treatment of COVID-19?

7. How has it been for you since COVID-19 started in Nigeria?

Prompts: What are the differences between work before the pandemic and during the pandemic? What are the changes and challenges in your work since COVID-19?

8. What is it like for you to care for COVID-19 patients?

Prompts: How does it make you feel? What were your feelings before the pandemic, during the first day of COVID-19 treatment and currently?

9. How have you coped with the changes and challenges in your work since COVID-19?

Prompt: Has anything helped or made things more difficult? What is the available support and what support do you still need?

10. Can you tell me a bit about the relationship between your work and personal life?

Prompts: What was it like before COVID-19? What is it like now?

11. Is there anything else you want to tell me that I haven't given you the chance to talk about?

Probe for insights they may have had from this pandemic.
